# Supplementary material for: BiPO4: A better host for doping lanthanide ions
Source: Royal Society of Chemistry journal article supplement (doi:10.1039/c2dt11944g), 2012-01-01
Supplement: c2dt11944g.pdf [file c2dt11944g.pdf]

## Supplementary Materials

### BiPO<sub>4</sub>: A better host for doping lanthanide ions

Boddu Sanyasi Naidu<sup>1</sup>, Bathula Vishwanadh<sup>2</sup>, Vasanthakumaran Sudarsan<sup>\*1</sup>, Rajesh Kumar Vatsa<sup>1</sup>

<sup>1</sup>Chemistry Division, <sup>2</sup> Materials Science Division,  
Bhabha Atomic research Centre, Trombay, Mumbai 400085, India

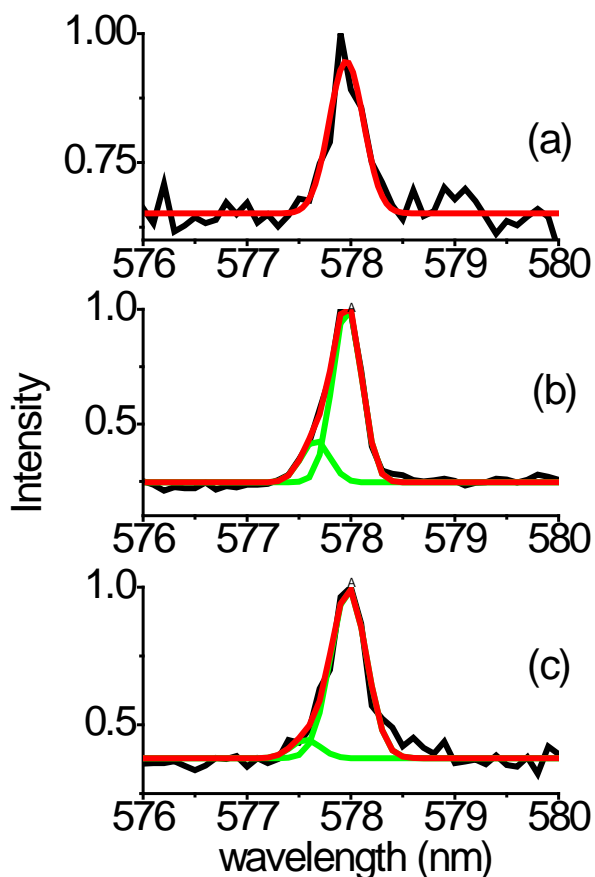

Figure 1. Emission spectrum from BiPO<sub>4</sub> samples containing (a) 1 atom % (b) 2.5 atom % and (c) 5 atom % Eu<sup>3+</sup> ions. Green line represents individual peak, red line represents overall fit and black line represents experimentally observed pattern. The excitation wavelength was 270 nm.

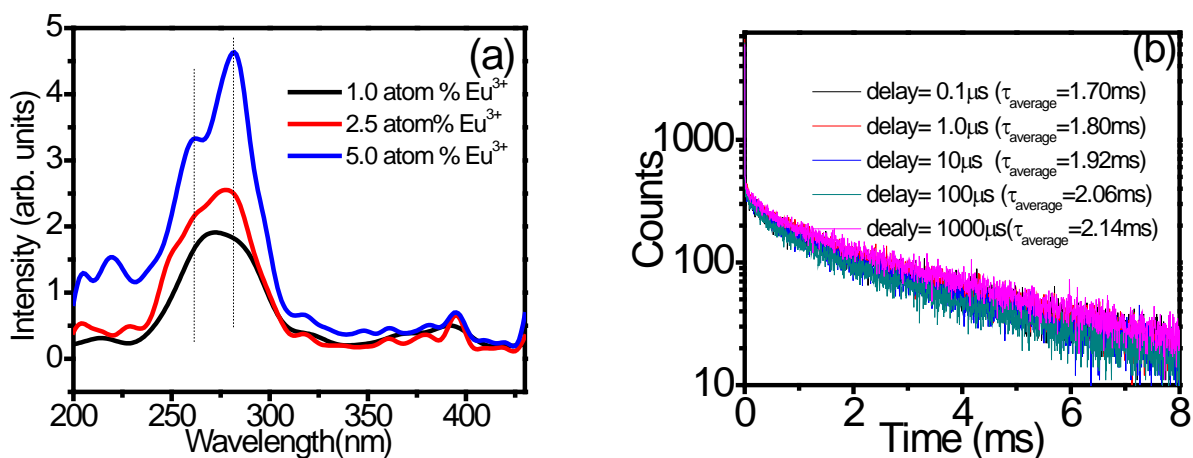

Figure 2. Excitation spectra (a) corresponding to 615 nm emission from BiPO<sub>4</sub> samples containing 1, 2.5 and 5 atom % Eu<sup>3+</sup> ions. The decay curves corresponding to the <sup>5</sup>D<sub>0</sub> level of Eu<sup>3+</sup> obtained with different trigger delays for representative 2.5 atom % Eu<sup>3+</sup> doped BiPO<sub>4</sub> sample are shown in Fig. 2(b). The excitation and emission wavelengths are 394 and 615 nm respectively.

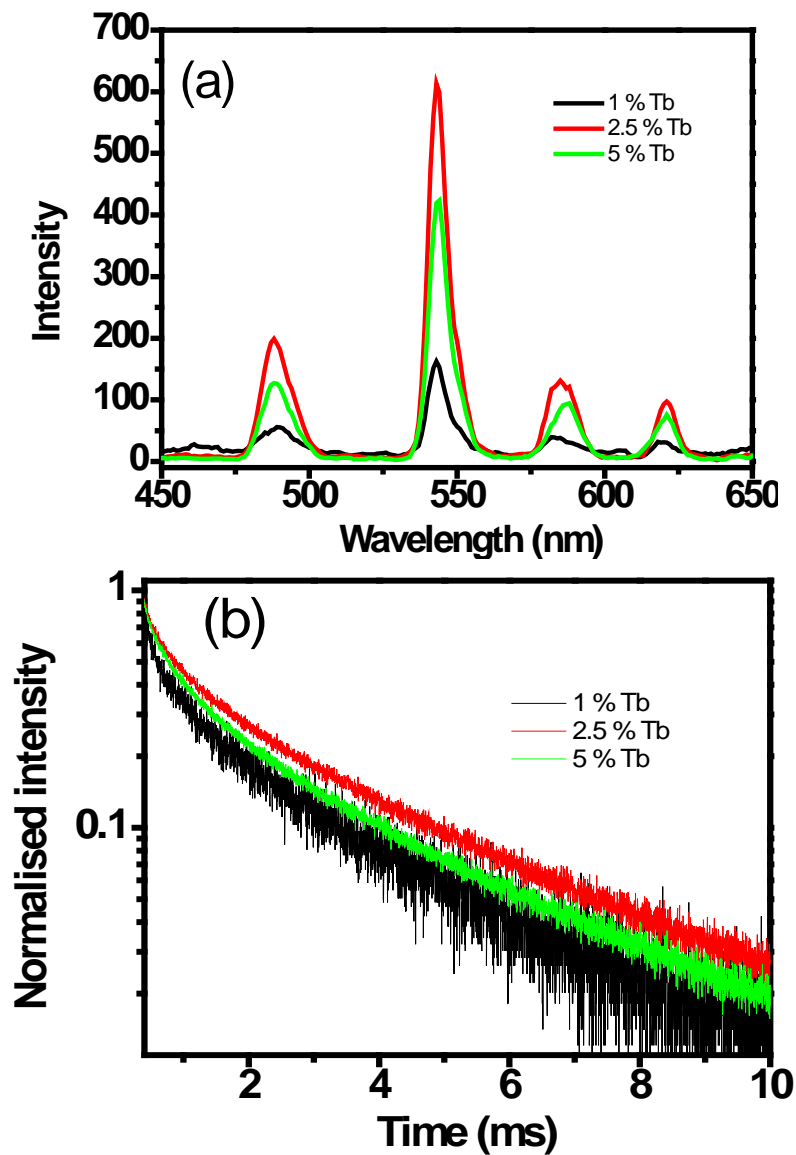

Figure 3. Emission spectra (a) and decay curves corresponding to <sup>5</sup>D<sub>4</sub> level of Tb<sup>3+</sup>(b) from monoclinic BiPO<sub>4</sub> nano-rods containing 1, 2.5 and 5 atom % Tb<sup>3+</sup>. The excitation and emission wavelengths are 255 and 545 nm respectively.

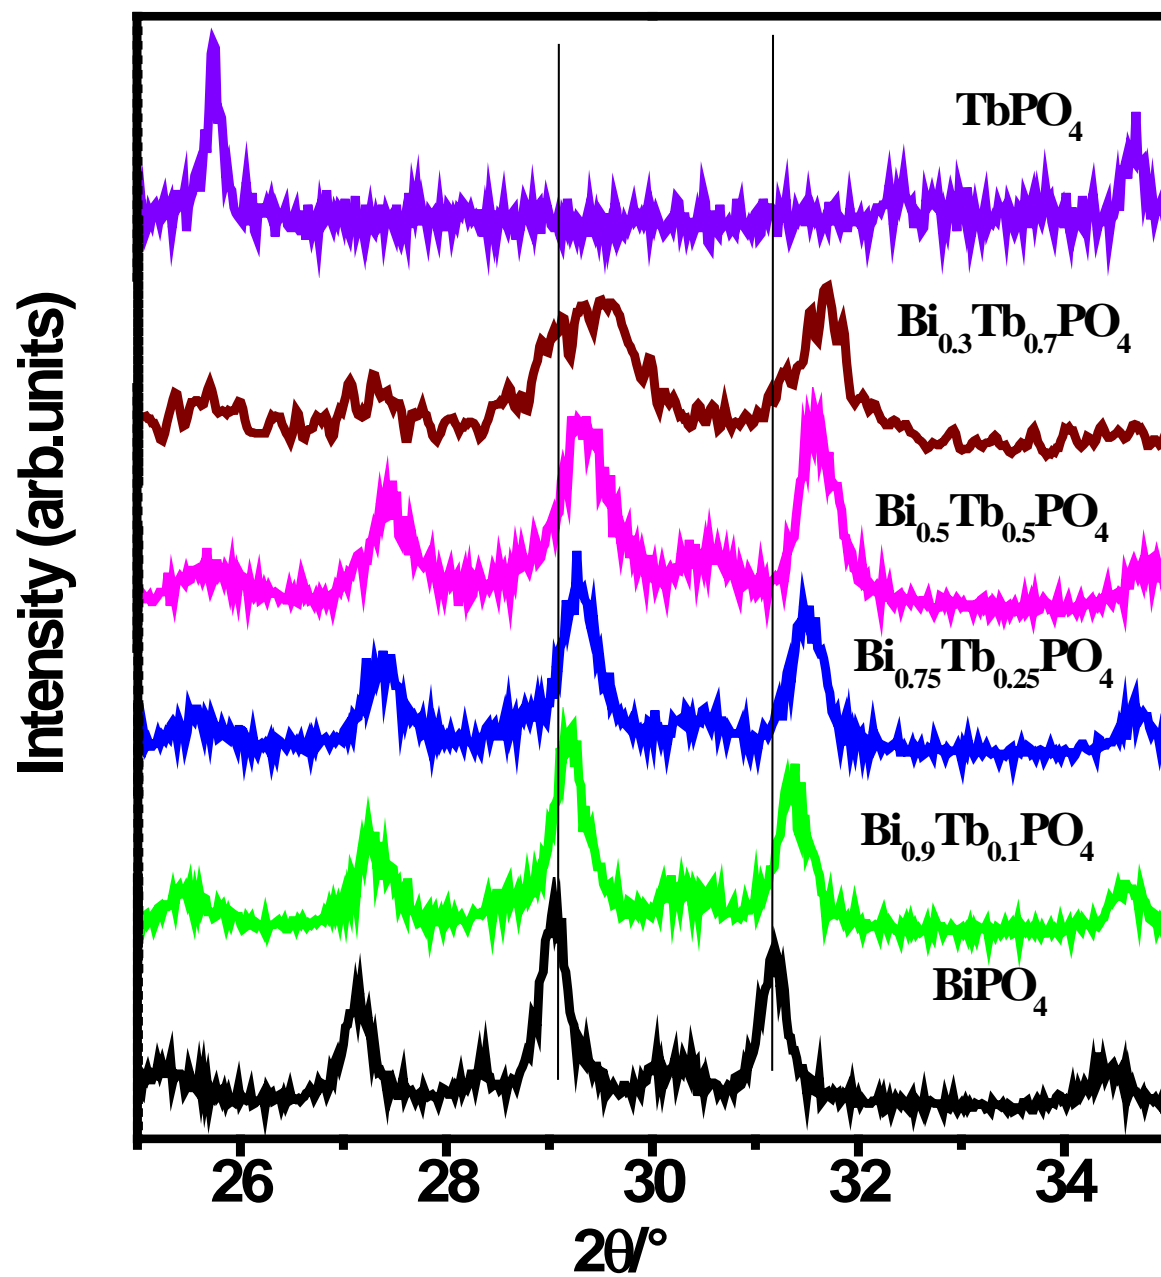

Figure 4. XRD patterns of  $\text{Bi}_{1-x}\text{Tb}_x\text{PO}_4$  ( $x = 0, 0.1, 0.25, 0.5, 0.7$  and  $1$ ) nanomaterials prepared at  $185^\circ\text{C}$ .

Table 1. Average lifetime values of  $^5D_4$  level of  $Tb^{3+}$  from monoclinic  $BiPO_4$  nanorods doped with different amounts of  $Tb^{3+}$  ions.

| % of $Tb^{3+}$ | Lifetime values of $^5D_4$<br>level of $Tb^{3+}$ |
|----------------|--------------------------------------------------|
|                | $\tau_{average}(ms)$                             |
| 1 atom %       | 1.97                                             |
| 2.5 atom %     | 2.38                                             |
| 5 atom %       | 2.13                                             |
